# Supplementary material for: Aerobic exercise and a BDNF-mimetic therapy rescue learning and memory in a mouse model of Down syndrome
Source: PubMed Central journal article supplement (PMC5715062; doi:10.1038/s41598-017-17201-8), 2017-12-04
Supplement: 41598_2017_17201_MOESM1_ESM.pdf [file 41598_2017_17201_MOESM1_ESM.pdf]

**Supplementary information for:**

## **Aerobic exercise and a BDNF-mimetic therapy rescue learning and memory in a mouse model of Down syndrome**

Martina Parrini<sup>1</sup>, Diego Ghezzi<sup>1†</sup>, Gabriele Deidda<sup>1§</sup>, Lucian Medrihan<sup>1^</sup>, Enrico Castroflorio<sup>2</sup>, Micol Alberti<sup>1</sup>, Pietro Baldelli<sup>2,3</sup>, Laura Cancedda<sup>1</sup> and Andrea Contestabile<sup>1\*</sup>.

<sup>1</sup> Department of Neuroscience and Brain Technologies, Istituto Italiano di Tecnologia, Genova, Italy.

<sup>2</sup> Center for Synaptic Neuroscience, Istituto Italiano di Tecnologia, Genova, Italy.

<sup>3</sup> Department of Experimental Medicine, University of Genova, Italy.

<sup>†</sup> Present address: Medtronic Chair in Neuroengineering, Center for Neuroprosthetics, Institute of Bioengineering, School of Engineering, École Polytechnique Fédérale de Lausanne, Switzerland

<sup>^</sup> Present address: Laboratory of Molecular and Cellular Neuroscience, Rockefeller University, NY, USA.

<sup>§</sup> Present address: School of Biosciences, Cardiff University, UK.

\*Corresponding author, [andrea.contestabile@iit.it](mailto:andrea.contestabile@iit.it)

**Supplementary text and figures:**

A

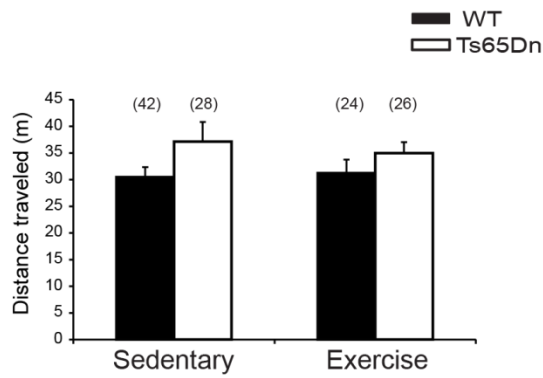

Supplementary Figure 1

**Supplementary Figure 1.** Physical exercise had no effect on general motor activity. (A) Distance traveled in the empty arena was not different across genotype and treatments. Two-way ANOVA on ranked transformed data: genotype [ $F_{1,116} = 4.460$ ,  $P = 0.037$ ], treatment [ $F_{1,116} = 0.038$ ,  $P = 0.845$ ], genotype x treatment [ $F_{1,116} = 0.015$ ,  $P = 0.901$ ]. Tukey *post hoc* test following two-way ANOVA did not reach statistical significance for any experimental group. Number in parenthesis indicates the number of mice tested for each experimental group.

A

Contextual fear conditioning

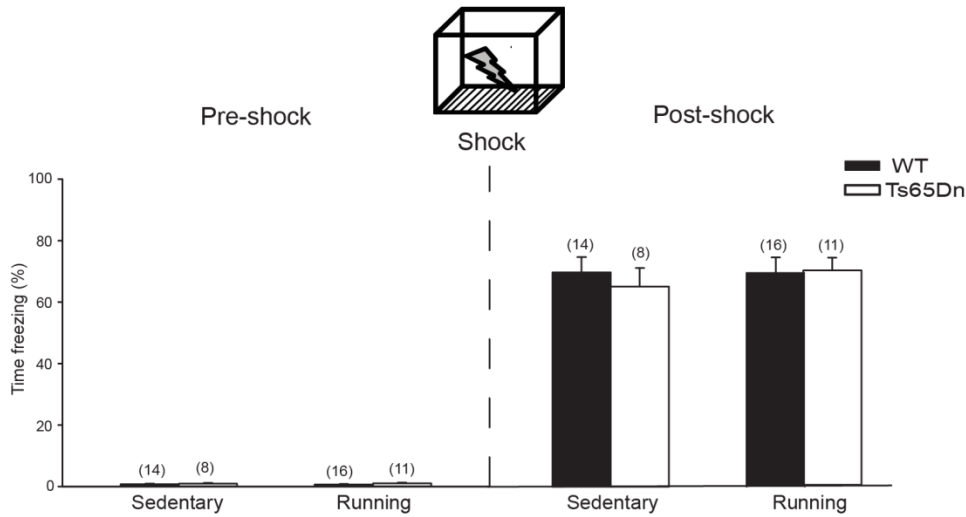

B

Object location

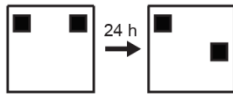

■ WT  
□ Ts65Dn

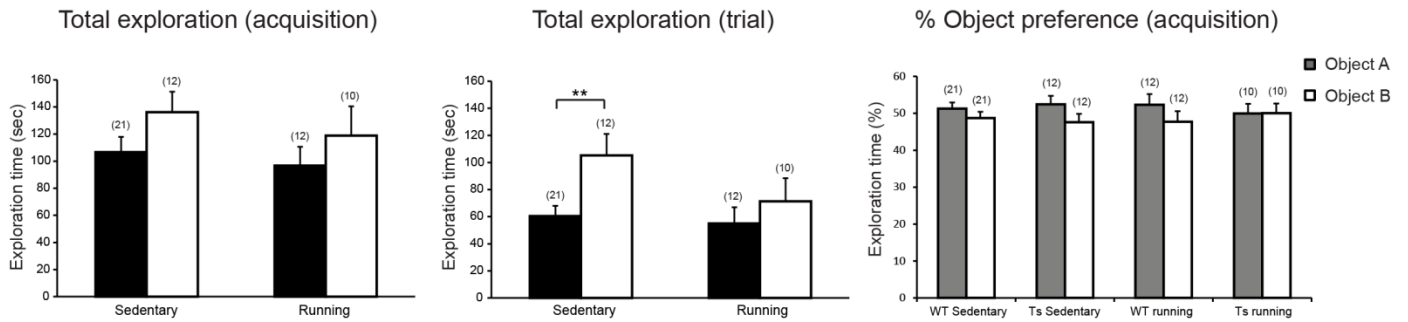

C

Novel object recognition

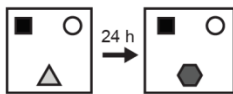

■ WT  
□ Ts65Dn

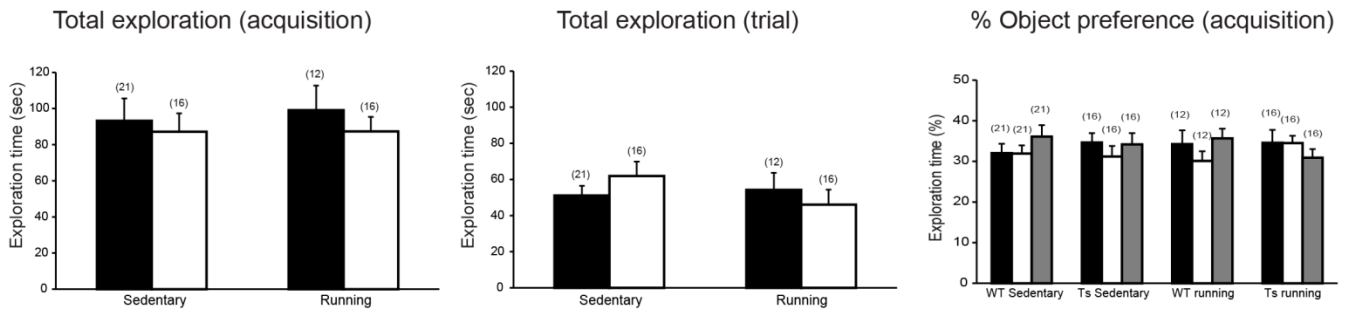

**Supplementary Figure 2.** (A) Physical exercise had no effect on the freezing time before (left) or immediately after (right) the electric foot shock during the conditioning session in both Ts65Dn and WT mice. Pre-shock two-way ANOVA on ranked transformed data: genotype [ $F_{1,45}=1.964$ ,  $P=0.168$ ]; treatment [ $F_{1,45}=0.0661$ ,  $P=0.798$ ]; genotype x treatment [ $F_{1,45}=0.00002$ ,  $P=0.996$ ]. Post-shock two-way ANOVA: genotype [ $F_{1,45}=0.171$ ,  $P=0.681$ ]; treatment [ $F_{1,45}=0.169$ ,  $P=0.683$ ]; genotype x treatment [ $F_{1,45}=0.194$ ,  $P=0.661$ ]. (B) *Left*: in the OL test the total exploration time during the acquisition phase was not significantly different across genotype and treatment. Two-way ANOVA: genotype [ $F_{1,51}=5.017$ ,  $P=0.029$ ]; treatment [ $F_{1,51}=0.641$ ,  $P=0.427$ ]; genotype x treatment [ $F_{1,51}=0.0223$ ,  $P=0.882$ ]. *Center*: the total exploration time during the trial phase was slightly increased in sedentary Ts65Dn mice compared to WT, however no significant difference was observed in Ts65Dn running mice compared to WT. Two-way ANOVA: genotype [ $F_{1,51}=9.164$ ,  $P=0.004$ ]; treatment [ $F_{1,51}=2.453$ ,  $P=0.123$ ]; genotype x treatment [ $F_{1,51}=0.914$ ,  $P=0.349$ ]. \*\* $P<0.01$ , Tukey post hoc test. *Right*: the percentage of time spent exploring the two objects during the acquisition phase was not statistically different across the experimental groups. Two-way ANOVA: genotype [ $F_{1,102}<0.0001$ ,  $P=1.000$ ]; treatment [ $F_{1,102}=1.331$ ,  $P=0.268$ ]; genotype x treatment [ $F_{1,102}=0.4014$ ,  $P=0.753$ ]. (C) *Left*: in the NOR test the total exploration time during the acquisition phases was not significantly different across genotype and treatment. Two-way ANOVA on ranked transformed data: genotype [ $F_{1,61}=0.585$ ;  $P=0.447$ ]; treatment [ $F_{1,61}=0.548$ ;  $P=0.462$ ]; genotype x treatment [ $F_{1,61}=0.0997$ ;  $P=0.753$ ]. *Center*: the total exploration time during the trial phase was not significantly different across genotype and treatment. Two-way ANOVA on ranked transformed data: genotype [ $F_{1,61}=0.0226$ ;  $P=0.881$ ]; treatment [ $F_{1,61}=1.892$ ;  $P=0.174$ ]; genotype x treatment [ $F_{1,61}=2.047$ ;  $P=0.158$ ]. *Right*: the percentage of time spent exploring the three objects during the acquisition phase was not statistically different across the experimental groups. Two-way ANOVA: genotype [ $F_{1,187}=0.231$ ;  $P=0.645$ ]; treatment [ $F_{1,187}=0.718$ ;  $P=0.629$ ]; genotype x treatment [ $F_{1,187}=0.895$ ;  $P=0.521$ ]. Number in parenthesis indicates the number of mice tested for each experimental group.

## Asymmetric synapses (Glutamatergic)

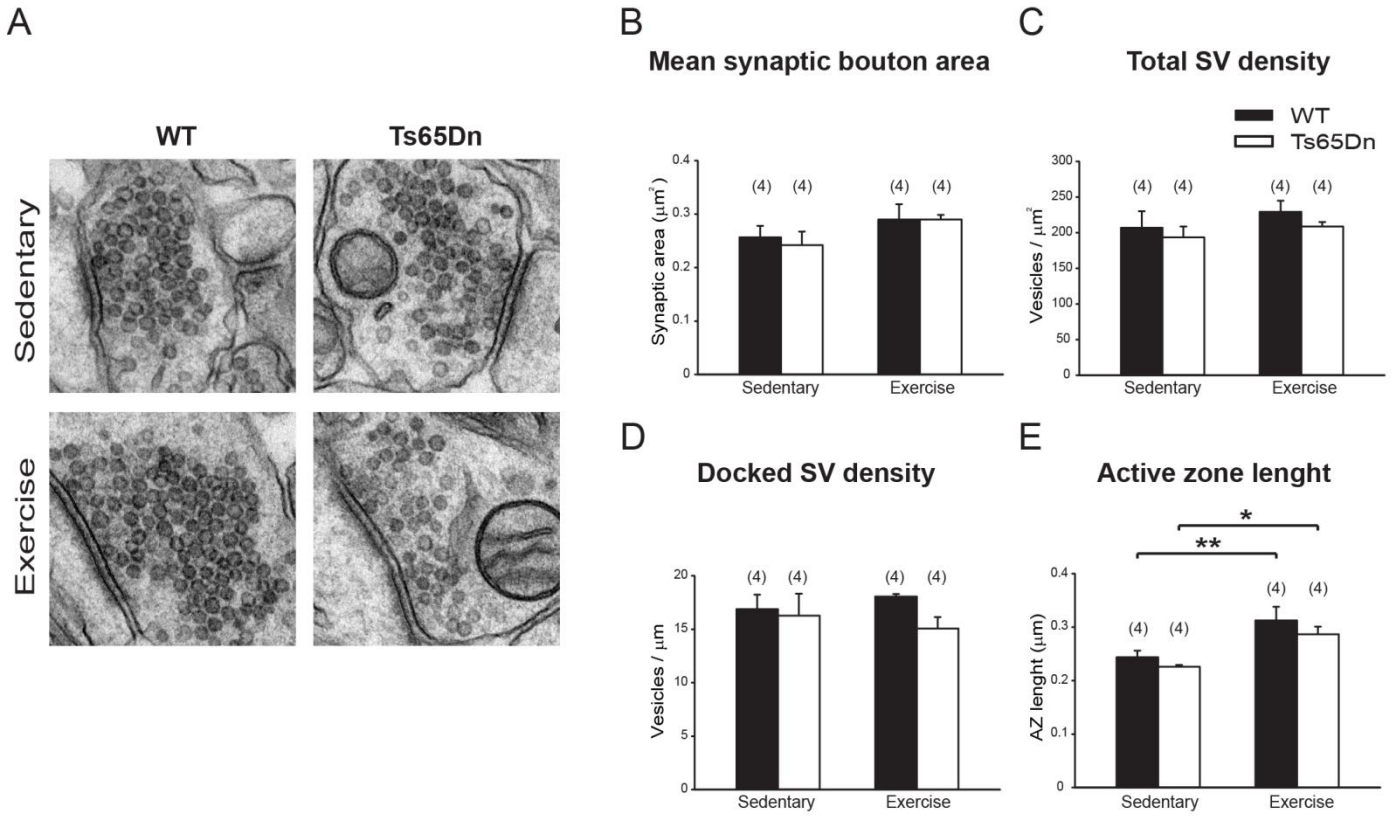

## Symmetric synapses (GABAergic)

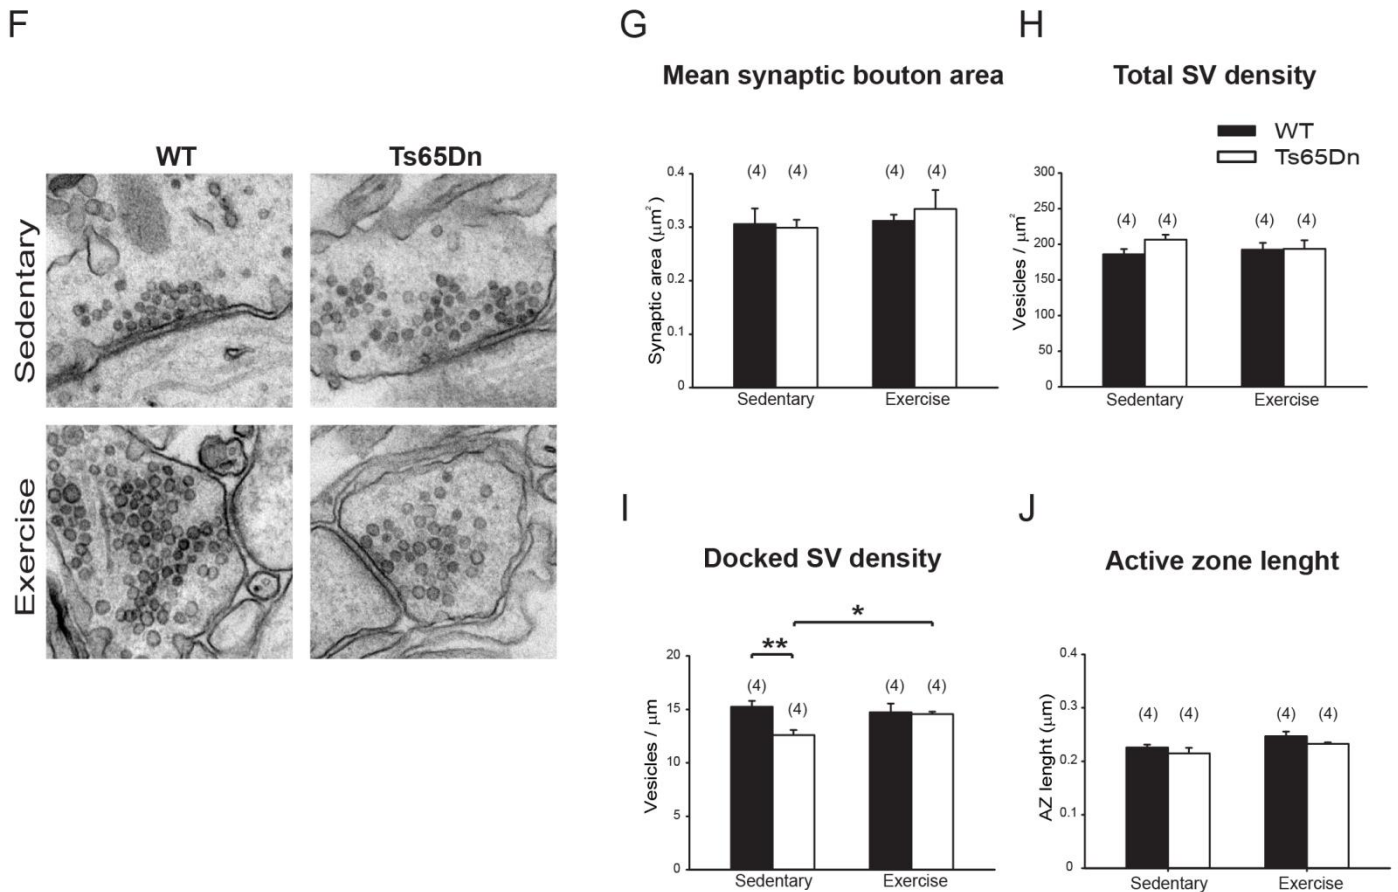

**Supplementary Figure 3.** Synaptic ultrastructural morphometric analysis in the hippocampal CA1 region. **(A)** Representative TEM images showing asymmetric (glutamatergic) synapses. **(B)** Mean asymmetric synaptic bouton area was not significantly different across genotype and treatment. Two-way ANOVA: genotype [ $F_{1,15}=0.108$ ,  $P=0.748$ ]; treatment [ $F_{1,15}=3.218$ ,  $P=0.098$ ]; genotype x treatment [ $F_{1,15}=0.097$ ,  $P=0.761$ ]. **(C)** Total synaptic vesicles (SV) density in asymmetric synapses was not significantly different across genotype and treatment. Two-way ANOVA: genotype [ $F_{1,15}=1.078$ ,  $P=0.320$ ]; treatment [ $F_{1,15}=1.333$ ,  $P=0.271$ ]; genotype x treatment [ $F_{1,15}=0.045$ ,  $P=0.836$ ]. **(D)** The density of docked SV in asymmetric synapses was not significantly different across genotype and treatment. Two-way ANOVA: genotype [ $F_{1,15}=1.797$ ,  $P=0.205$ ]; treatment [ $F_{1,15}<0.0001$ ,  $P=0.997$ ]; genotype x treatment [ $F_{1,15}=0.779$ ,  $P=0.395$ ]. **(E)** In asymmetric synapses the length of the active zone was increased by exercise in both WT and Ts65Dn mice. Two-way ANOVA: genotype [ $F_{1,15}=1.889$ ,  $P=0.194$ ]; treatment [ $F_{1,15}=16.940$ ,  $P=0.001$ ]; genotype x treatment [ $F_{1,15}=0.0745$ ,  $P=0.790$ ]. **(F)** Representative TEM images showing symmetric (GABAergic) synapses. **(G)** Mean symmetric synaptic bouton area was not significantly different across genotype and treatment. Two-way ANOVA: genotype [ $F_{1,15}=0.0952$ ,  $P=0.763$ ]; treatment [ $F_{1,15}=0.679$ ,  $P=0.426$ ]; genotype x treatment [ $F_{1,15}=0.353$ ,  $P=0.564$ ]. **(H)** Total SV density in symmetric synapses was not significantly different across genotype and treatment. Two-way ANOVA: genotype [ $F_{1,15}=1.379$ ,  $P=0.263$ ]; treatment [ $F_{1,15}=0.124$ ,  $P=0.731$ ]; genotype x treatment [ $F_{1,15}=1.145$ ,  $P=0.306$ ]. **(I)** The density of docked SV in symmetric synapses was reduced in sedentary Ts65Dn mice and significantly restored by exercise. Two-way ANOVA: genotype [ $F_{1,15}=6.265$ ,  $P=0.028$ ]; treatment [ $F_{1,15}=1.633$ ,  $P=0.225$ ]; genotype x treatment [ $F_{1,15}=4.922$ ,  $P=0.047$ ]. **(J)** In symmetric synapses the length of the active zone was not significantly different across genotype and treatment. Two-way ANOVA: genotype [ $F_{1,15}=2.777$ ,  $P=0.121$ ]; treatment [ $F_{1,15}=6.939$ ,  $P=0.022$ ]; genotype x treatment [ $F_{1,15}=0.0233$ ,  $P=0.881$ ]. \* $P<0.05$ , \*\* $P<0.01$ , Tukey *post hoc* test following two-way ANOVA. Number in parenthesis indicates the number of mice tested for each experimental group.

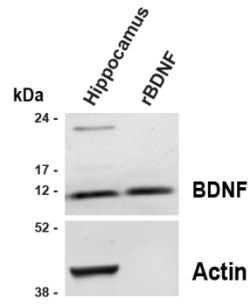

Supplementary Figure 4

**Supplementary Figure 4.** Specificity of the anti-BDNF antibody used for western blot analysis. Representative immunoblot with anti-BDNF antibody on hippocampal protein extracts or recombinant BDNF (rBDNF). Actin was used as loading control and is absent in rBDNF line.

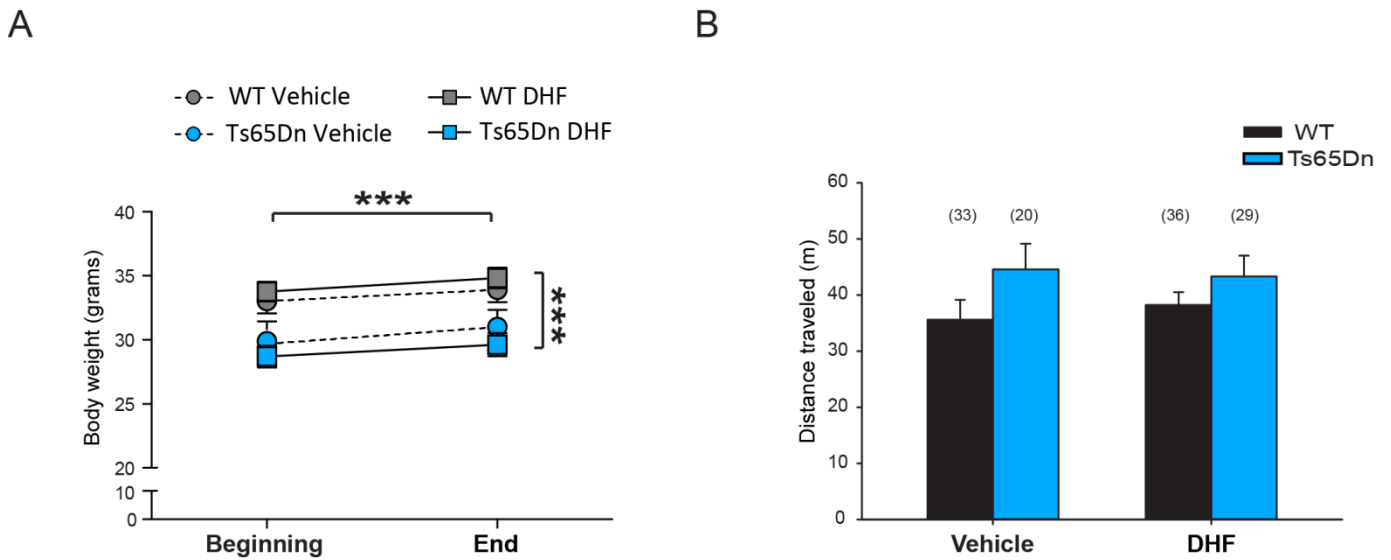

Supplementary Figure 5

**Supplementary Figure 5.** DHF treatment had no effect on body weight gain and general motor activity. **(A)** Mice body weight was measured at the beginning and at the end (4 weeks later) of chronic DHF or vehicle treatment. As previously reported (Costa, et al. 2010), mean body weight was greater in WT than in Ts65Dn mice ( $P < 0.001$ ). All groups of mice showed comparable and significant weight gain ( $P < 0.001$  for all groups) during the 4-week treatment period independently of genotype. Two-way repeated measure ANOVA on ranked-transformed data: genotype [ $F_{3,114} = 8.509$ ,  $P < 0.001$ ], time-point [ $F_{1,114} = 59.318$ ,  $P < 0.001$ ], genotype x time-point [ $F_{3,114} = 0.407$ ,  $P = 0.748$ ]. \*\*\* $P < 0.001$ , Tukey *post hoc* test. **(B)** Motor activity was evaluated by measuring the distance traveled in the empty arena by mice after chronic DHF or vehicle treatment. Distance traveled was not different across genotype and treatments. Two-way ANOVA: genotype [ $F_{1,114} = 4.058$ ,  $P = 0.046$ ], treatment [ $F_{1,114} = 0.039$ ,  $P = 0.843$ ], genotype x treatment [ $F_{1,114} = 0.313$ ,  $P = 0.577$ ]. Tukey *post hoc* test following two-way ANOVA did not reach statistical significance for any experimental group. Number in parenthesis indicates the number of mice tested for each experimental group.



A

Contextual fear conditioning

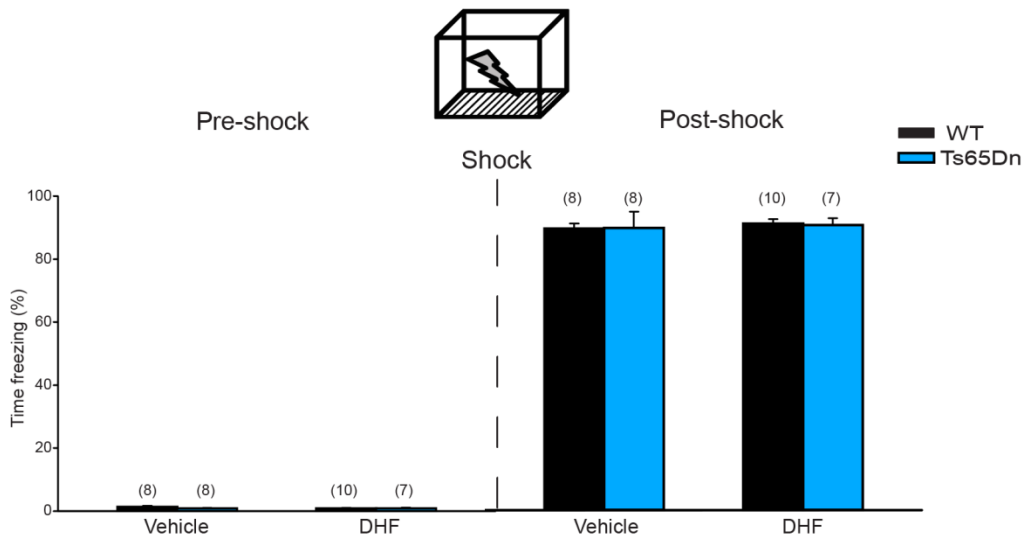

B

Object location

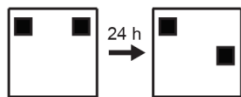

■ WT  
■ Ts65Dn

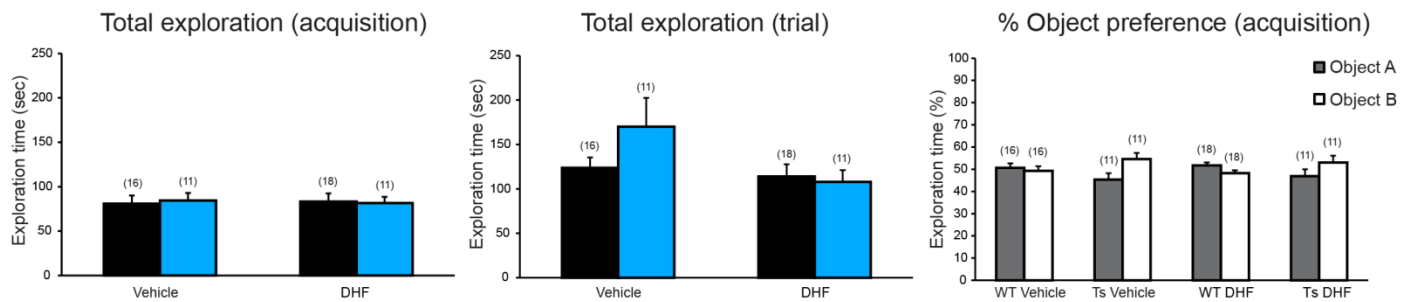

C

Novel object recognition

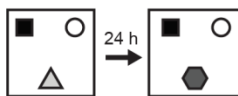

■ WT  
■ Ts65Dn

■ Object A  
■ Object B  
■ Object C

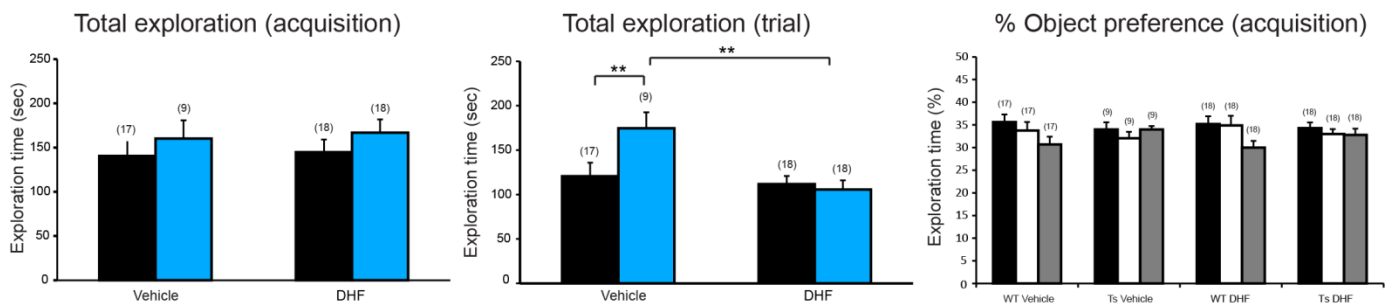

Supplementary Figure 6

**Supplementary Figure 6.** (A) DHF treatment had no effect on the freezing time before (left) or immediately after (right) the electric foot shock during the conditioning session in both Ts65Dn and WT mice. Pre-shock two-way ANOVA: genotype [ $F_{1,29}=1.357$ ,  $P=0.254$ ]; treatment [ $F_{1,29}=0.505$ ,  $P=0.483$ ]; genotype x treatment [ $F_{1,29}=1.665$ ,  $P=0.207$ ]. Post-shock two-way ANOVA: genotype [ $F_{1,29}=0.576$ ,  $P=0.454$ ]; treatment [ $F_{1,29}=0.140$ ,  $P=0.711$ ]; genotype x treatment [ $F_{1,29}=2.394$ ,  $P=0.133$ ]. (B) *Left*: in the OL the total exploration time during the acquisition phase was not significantly different across genotype and treatment. Two-way ANOVA: genotype [ $F_{1,52}=0.0084$ ,  $P=0.927$ ]; treatment [ $F_{1,52}=0.0005$ ,  $P=0.981$ ]; genotype x treatment [ $F_{1,52}=0.0803$ ,  $P=0.778$ ]. *Center*: the total exploration time during the trial phase was not significant different across genotype and treatment. Two-way ANOVA: genotype [ $F_{1,52}=0.215$ ,  $P=0.645$ ]; treatment [ $F_{1,52}=3.764$ ,  $P=0.058$ ]; genotype x treatment [ $F_{1,52}=0.972$ ,  $P=0.329$ ]. *Right*: the percentage of time spent exploring the two objects during the acquisition phase was not statistically different across the experimental groups. Two-way ANOVA: genotype [ $F_{1,102}<0.0001$ ,  $P=1.000$ ]; treatment [ $F_{1,102}=1.108$ ,  $P=0.349$ ]; genotype x treatment [ $F_{1,102}=2.680$ ,  $P=0.051$ ]. Number in parenthesis indicates the number of mice tested for each group experimental. (C) *Left*: in the NOR test the total exploration time during the acquisition was not significantly different across genotype and treatment. Two-way ANOVA: genotype [ $F_{1,58}=1.526$ ;  $P=0.222$ ]; treatment [ $F_{1,58}=0.101$ ;  $P=0.752$ ]; genotype x treatment [ $F_{1,58}=0.0059$ ;  $P=0.939$ ]. *Center*: the total exploration time during the trial phase was slightly increased in vehicle-treated Ts65Dn mice compared to WT, however no significant difference was observed in Ts65Dn mice treated with DHF compared to WT. Two-way ANOVA: genotype [ $F_{1,58}=3.301$ ;  $P=0.074$ ]; treatment [ $F_{1,58}=8.720$ ;  $P=0.005$ ]; genotype x treatment [ $F_{1,58}=5.193$ ;  $P=0.026$ ]. *Right*: the percentage of time spent exploring the three objects was not statistically different across groups. Two-way ANOVA on ranked transformed data: genotype [ $F_{1,174}=0.110$ ;  $P=0.741$ ]; treatment [ $F_{1,174}=1.396$ ;  $P=0.228$ ]; genotype x treatment [ $F_{1,174}=1.141$ ;  $P=0.340$ ]. The number in parenthesis indicate the number of mice tested for each experimental group. \*\* $p<0.01$ , Tukey *post hoc* test following two-way ANOVA.

Full-length blots for Figure 4B

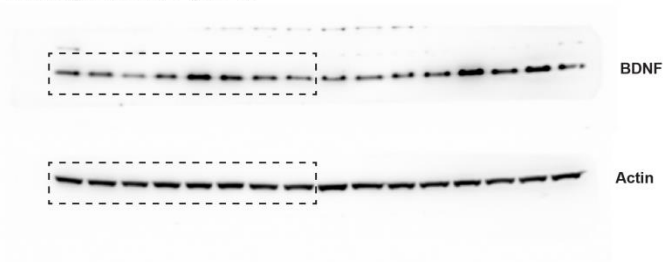

Full-length blots for Figure 5A

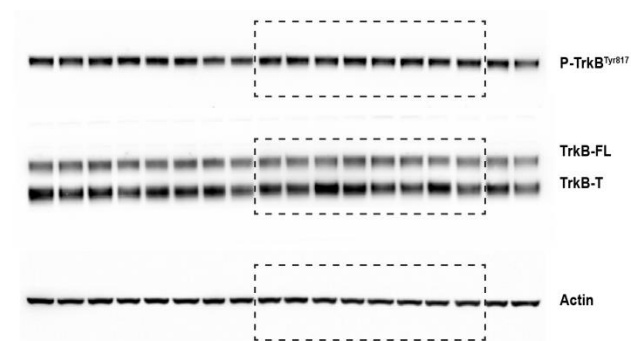

Full-length blots for Figure 5B

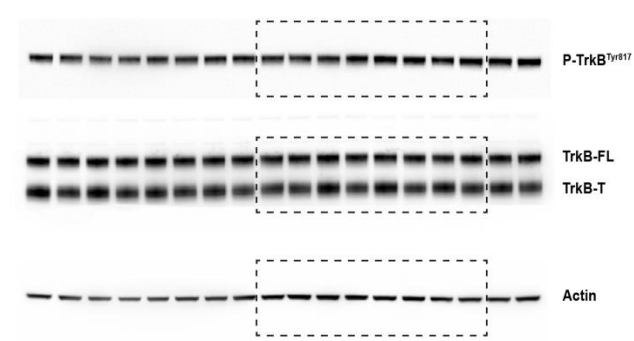

Full-length blots for Figure 5C

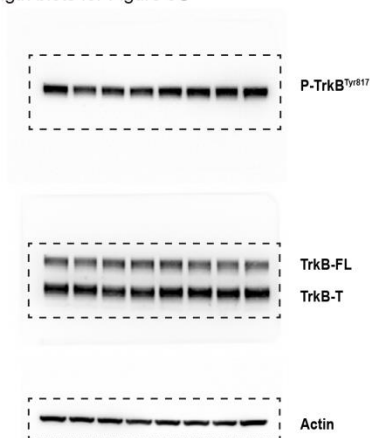

Full-length blots for Figure 5D

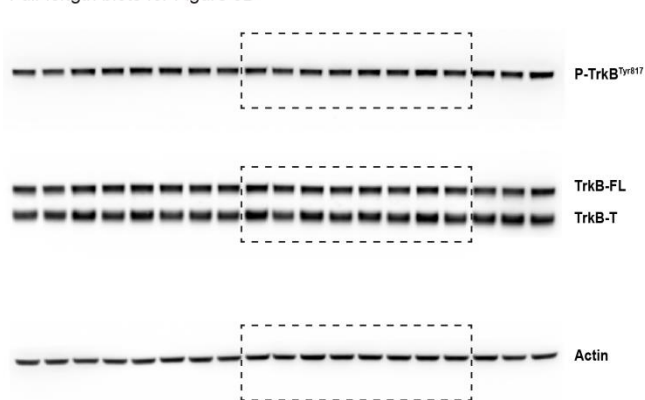

Full-length blots for Figure 7B

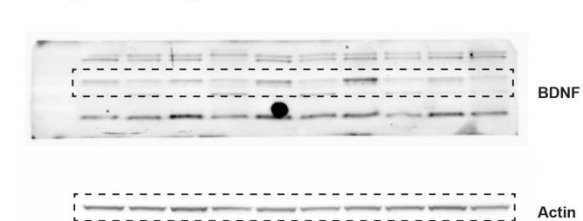

Full-length blots for Supplementary Figure 4

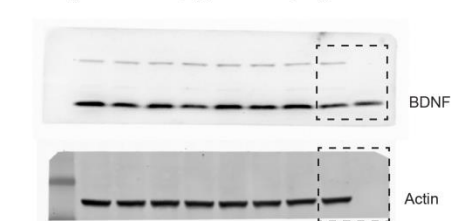

Supplementary Figure 7

**Supplementary Fig. 7** Full-length blot images corresponding to the cropped western blot presented in Figure 4, 5, 7 and Supplementary Figure 4.

**Supplementary Table 1.** Primer sequences for RT-qPCR analysis.

| Gene symbol     | Gene name                                | Organism     | Accession number                                                                                                                                                                                                                        | Forward primer (5'-3')   | Reverse primer (5'-3')       |
|-----------------|------------------------------------------|--------------|-----------------------------------------------------------------------------------------------------------------------------------------------------------------------------------------------------------------------------------------|--------------------------|------------------------------|
| ACTB            | Actin beta                               | Homo Sapiens | NM_0011101                                                                                                                                                                                                                              | CAGCAAGCAGGAGTATGAC      | GAAAGGGTGTAAACGCAACT         |
| GAPDH           | Glyceraldehyde-3-phosphate dehydrogenase | Homo Sapiens | NM_001256799                                                                                                                                                                                                                            | AATGAAGGGGTCAATTGATGG    | AAGGTGAAGGTCCGAGTCAA         |
| PPIA            | Peptidylprolyl isomerase A               | Homo Sapiens | NM_021130                                                                                                                                                                                                                               | TTCTGCTGTCTTTGGGACCT     | CACCGTGTCTTCGACATTG          |
| BDNF (CDS)      | Brain-derived neurotrophic factor        | Homo Sapiens | NM_001143805<br>NM_001143806<br>NM_001143807<br>NM_001143808<br>NM_001143809<br>NM_00114381<br>NM_001143811<br>NM_00114381<br>NM_001143814<br>NM_00114381<br>NM_001709<br>NM_170731<br>NM_170732<br>NM_170733<br>NM_170734<br>NM_170735 | CGAGACCAAGTGCAATCC       | TTATGAATCGCCAGCCAAT          |
| Actb            | Actin beta                               | Mus Musculus | NM_007393                                                                                                                                                                                                                               | AAGTGGTTACAGGAAGTCC      | ATAATTTACACAGAAGCAATGC       |
| Gapdh           | Glyceraldehyde-3-phosphate dehydrogenase | Mus Musculus | NM_008084                                                                                                                                                                                                                               | GAACATCATCCCTGCATCCA     | CCAGTGAGCTTCCCGTTCA          |
| Ppia            | Peptidylprolyl isomerase A               | Mus Musculus | NM_008907                                                                                                                                                                                                                               | CACTGTGCTTTTCGCCGCTTG    | TTTCTGCTGTCTTTGGAACTTTGTCTGC |
| Bdnf (Exon I)   | Brain-derived neurotrophic factor        | Mus Musculus | NM_007540                                                                                                                                                                                                                               | TGGTAACCTCGCTCATTATTAGA  | CCCTTCGCAATATCCGCAAAG        |
| Bdnf (Exon II)  | Brain-derived neurotrophic factor        | Mus Musculus | NM_001048139                                                                                                                                                                                                                            | CTTTTCTCGCTGTCAAG        | TTGCCAAGAGTCTATTCC           |
| Bdnf (Exon III) | Brain-derived neurotrophic factor        | Mus Musculus | NM_001285419                                                                                                                                                                                                                            | TCACGATCCTCGATGGATAGTTCT | AGGGAGTGGAGCGCAGTC           |
| Bdnf (Exon IV)  | Brain-derived neurotrophic factor        | Mus Musculus | NM_001048141                                                                                                                                                                                                                            | CAAATGGAGCTTCTCGCTGAAGGC | GTGGA AATTGCATGGCGGAGGTAA    |
| Bdnf (Exon V)   | Brain-derived neurotrophic factor        | Mus Musculus | NM_001285420                                                                                                                                                                                                                            | ACCATAACCCCGCACACTCTGT   | GCACCTCCCGCACCACAAA          |
| Bdnf (Exon VI)  | Brain-derived neurotrophic factor        | Mus Musculus | NM_001048142                                                                                                                                                                                                                            | CTTCAACTGCCACCACTG       | CATTGTTGTACGCTTCTG           |
| Bdnf (Exon VII) | Brain-derived neurotrophic factor        | Mus Musculus | NM_001285417                                                                                                                                                                                                                            | GCTTACTTACAGGTCCAAGGTCAA | GTCCTGGAGTTCGCGAGAC          |
| Bdnf (CDS)      | Brain-derived neurotrophic factor        | Mus Musculus | NM_007540<br>NM_001048139<br>NM_001048141<br>NM_001048142<br>NM_001285416<br>NM_001285417<br>NM_001285418<br>NM_001285419<br>NM_001285420<br>NM_001285421<br>NM_001285422                                                               | ATTACCTGGATGCCGCAAA      | TAATACTGTCACACAGCTCA         |

**Supplementary Table 2.** Calibration curves parameters, PCR reaction efficiency and amplicon information for RT-qPCR analysis.

| Gene symbol     | Organism     | Amplicon length (bp) | Final primer concentration ( $\mu\text{M}$ ) | Calibration curve (slope / $R^2$ ) | Calculated PCR efficiency (%) | Primer dimers       |
|-----------------|--------------|----------------------|----------------------------------------------|------------------------------------|-------------------------------|---------------------|
| ACTB            | Homo Sapiens | 91                   | 0.2                                          | -3.242 / 0.997                     | 103.4                         | Not detected        |
| GAPDH           | Homo Sapiens | 108                  | 0.2                                          | -3.493 / 0.999                     | 93.3                          | Only in NTC samples |
| PPIA            | Homo Sapiens | 91                   | 0.2                                          | -3.446 / 0.997                     | 95.1                          | Not detected        |
| BDNF (CDS)      | Homo Sapiens | 149                  | 0.2                                          | -3.282 / 0.999                     | 101.7                         | Not detected        |
| Actb            | Mus Musculus | 123                  | 0.1                                          | -3.130 / 0.986                     | 108.7                         | Not detected        |
| Gapdh           | Mus Musculus | 77                   | 0.2                                          | -3.370 / 0.999                     | 98.0                          | Only in NTC samples |
| Ppia            | Mus Musculus | 133                  | 0.2                                          | -3.321 / 0.994                     | 100.0                         | Only in NTC samples |
| Bdnf (Exon I)   | Mus Musculus | 172                  | 0.2                                          | -3.450 / 0.999                     | 94.9                          | Not detected        |
| Bdnf (Exon II)  | Mus Musculus | 200                  | 0.1                                          | -3.175 / 0.998                     | 106.5                         | Not detected        |
| Bdnf (Exon III) | Mus Musculus | 150                  | 0.2                                          | -3.716 / 0.994                     | 85.3                          | Not detected        |
| Bdnf (Exon IV)  | Mus Musculus | 57                   | 0.2                                          | -3.584 / 0.999                     | 90.1                          | Not detected        |
| Bdnf (Exon V)   | Mus Musculus | 73                   | 0.2                                          | -3.536 / 0.997                     | 91.8                          | Not detected        |
| Bdnf (Exon VI)  | Mus Musculus | 87                   | 0.2                                          | -3.573 / 0.999                     | 90.5                          | Only in NTC samples |
| Bdnf (Exon VII) | Mus Musculus | 93                   | 0.2                                          | -3.503 / 0.996                     | 92.9                          | Not detected        |
| Bdnf (CDS)      | Mus Musculus | 90                   | 0.2                                          | -3.315 / 0.999                     | 100.3                         | Not detected        |





|     |        |           |   |  |   |   |   |   |   |   |
|-----|--------|-----------|---|--|---|---|---|---|---|---|
| 69  | WT     | sedentary |   |  |   |   |   |   | * |   |
| 70  | WT     | sedentary |   |  |   |   |   |   | * |   |
| 71  | WT     | sedentary |   |  |   |   |   |   | * |   |
| 72  | WT     | sedentary |   |  |   |   |   |   | * |   |
| 73  | WT     | sedentary |   |  |   |   |   |   | * |   |
| 74  | WT     | sedentary |   |  |   |   |   |   | * |   |
| 75  | WT     | sedentary |   |  |   |   |   |   | * |   |
| 76  | WT     | sedentary |   |  |   |   |   |   | * |   |
| 77  | WT     | sedentary |   |  |   |   |   |   | * |   |
| 78  | WT     | sedentary |   |  |   |   |   |   | * |   |
| 79  | WT     | sedentary |   |  |   |   |   |   | * |   |
| 80  | WT     | sedentary |   |  |   |   |   |   |   | * |
| 81  | WT     | sedentary |   |  |   |   |   |   |   | * |
| 82  | WT     | sedentary |   |  |   |   |   |   |   | * |
| 83  | WT     | sedentary |   |  |   |   |   |   |   | * |
| 84  | WT     | sedentary |   |  |   |   |   |   |   | * |
| 85  | WT     | sedentary |   |  |   |   |   |   |   | * |
| 86  | WT     | sedentary |   |  |   |   |   |   |   | * |
| 87  | WT     | sedentary |   |  |   |   |   |   |   | * |
| 88  | WT     | sedentary |   |  |   |   |   |   |   | * |
| 89  | WT     | sedentary |   |  |   |   |   |   |   | * |
| 90  | WT     | sedentary |   |  |   |   |   |   |   | * |
| 91  | WT     | sedentary |   |  |   |   |   |   |   | * |
| 92  | Ts65Dn | sedentary | * |  |   | * |   |   |   |   |
| 93  | Ts65Dn | sedentary | * |  |   | * | * | * |   |   |
| 94  | Ts65Dn | sedentary | * |  |   | * |   |   |   |   |
| 95  | Ts65Dn | sedentary | * |  |   | * | * |   |   |   |
| 96  | Ts65Dn | sedentary | * |  |   | * | * | * |   |   |
| 97  | Ts65Dn | sedentary | * |  |   | * |   |   |   |   |
| 98  | Ts65Dn | sedentary | * |  |   | * | * |   |   |   |
| 99  | Ts65Dn | sedentary | * |  |   | * | * | * | * |   |
| 100 | Ts65Dn | sedentary | * |  |   | * | * | * | * |   |
| 101 | Ts65Dn | sedentary | * |  |   | * | * |   |   |   |
| 102 | Ts65Dn | sedentary | * |  |   | * | * |   |   |   |
| 103 | Ts65Dn | sedentary | * |  |   | * | * |   |   |   |
| 104 | Ts65Dn | sedentary | * |  |   |   |   |   |   |   |
| 105 | Ts65Dn | sedentary | * |  |   |   |   |   |   |   |
| 106 | Ts65Dn | sedentary | * |  |   |   |   |   |   |   |
| 107 | Ts65Dn | sedentary | * |  |   |   |   |   |   |   |
| 108 | Ts65Dn | sedentary | * |  |   |   |   |   |   |   |
| 109 | Ts65Dn | sedentary |   |  | * |   |   |   |   |   |
| 110 | Ts65Dn | sedentary |   |  | * |   |   |   |   |   |
| 111 | Ts65Dn | sedentary |   |  | * |   |   |   |   |   |
| 112 | Ts65Dn | sedentary |   |  | * |   |   |   |   |   |
| 113 | Ts65Dn | sedentary |   |  | * |   |   |   |   |   |
| 114 | Ts65Dn | sedentary |   |  | * |   |   |   |   |   |
| 115 | Ts65Dn | sedentary |   |  | * |   |   |   |   |   |



|     |        |           |   |   |   |   |   |   |   |   |   |
|-----|--------|-----------|---|---|---|---|---|---|---|---|---|
| 116 | Ts65Dn | sedentary |   | * | * |   |   |   |   |   |   |
| 117 | Ts65Dn | sedentary |   | * |   |   |   |   |   |   |   |
| 118 | Ts65Dn | sedentary |   | * |   |   |   |   |   |   |   |
| 119 | Ts65Dn | sedentary |   | * |   |   |   |   |   |   |   |
| 120 | Ts65Dn | sedentary |   | * |   |   |   |   |   |   |   |
| 121 | Ts65Dn | sedentary |   | * |   |   |   |   |   |   |   |
| 122 | Ts65Dn | sedentary |   | * |   |   |   |   |   |   |   |
| 123 | Ts65Dn | sedentary |   | * |   |   |   |   |   |   |   |
| 124 | Ts65Dn | sedentary |   | * |   |   |   |   |   |   |   |
| 125 | Ts65Dn | sedentary |   | * |   |   |   |   |   |   |   |
| 126 | Ts65Dn | sedentary |   | * |   |   |   |   |   |   |   |
| 127 | Ts65Dn | sedentary |   | * |   |   |   |   |   |   |   |
| 128 | Ts65Dn | sedentary |   |   |   |   |   |   |   | * |   |
| 129 | Ts65Dn | sedentary |   |   |   |   |   |   |   | * |   |
| 130 | Ts65Dn | sedentary |   |   |   |   |   |   |   | * |   |
| 131 | Ts65Dn | sedentary |   |   |   |   |   |   |   | * |   |
| 132 | Ts65Dn | sedentary |   |   |   |   |   |   |   | * |   |
| 133 | Ts65Dn | sedentary |   |   |   |   |   |   |   | * |   |
| 134 | Ts65Dn | sedentary |   |   |   |   |   |   |   | * |   |
| 135 | Ts65Dn | sedentary |   |   |   |   |   |   |   | * |   |
| 136 | Ts65Dn | sedentary |   |   |   |   |   |   |   | * |   |
| 137 | Ts65Dn | sedentary |   |   |   |   |   |   |   | * |   |
| 138 | Ts65Dn | sedentary |   |   |   |   |   |   |   | * |   |
| 139 | Ts65Dn | sedentary |   |   |   |   |   |   |   | * |   |
| 140 | Ts65Dn | sedentary |   |   |   |   |   |   |   |   | * |
| 141 | Ts65Dn | sedentary |   |   |   |   |   |   |   |   | * |
| 142 | Ts65Dn | sedentary |   |   |   |   |   |   |   |   | * |
| 143 | Ts65Dn | sedentary |   |   |   |   |   |   |   |   | * |
| 144 | Ts65Dn | sedentary |   |   |   |   |   |   |   |   | * |
| 145 | Ts65Dn | sedentary |   |   |   |   |   |   |   |   | * |
| 146 | Ts65Dn | sedentary |   |   |   |   |   |   |   |   | * |
| 147 | Ts65Dn | sedentary |   |   |   |   |   |   |   |   | * |
| 148 | Ts65Dn | sedentary |   |   |   |   |   |   |   |   | * |
| 149 | Ts65Dn | sedentary |   |   |   |   |   |   |   |   | * |
| 150 | Ts65Dn | sedentary |   |   |   |   |   |   |   |   | * |
| 151 | Ts65Dn | sedentary |   |   |   |   |   |   |   |   | * |
| 152 | WT     | exercise  | * |   |   | * |   |   |   |   |   |
| 153 | WT     | exercise  | * |   |   | * |   |   |   |   |   |
| 154 | WT     | exercise  | * |   |   | * |   |   |   |   |   |
| 155 | WT     | exercise  | * |   |   | * |   | * |   |   |   |
| 156 | WT     | exercise  | * |   |   | * |   |   |   |   |   |
| 157 | WT     | exercise  | * |   |   | * |   |   |   |   |   |
| 158 | WT     | exercise  | * |   |   | * |   | * | * |   |   |
| 159 | WT     | exercise  | * |   |   | * |   | * |   |   |   |
| 160 | WT     | exercise  | * |   |   | * | * | * |   |   |   |
| 161 | WT     | exercise  | * |   |   | * | * | * |   |   |   |
| 162 | WT     | exercise  | * |   |   | * | * | * |   |   |   |



|     |        |          |   |   |   |   |   |   |   |   |   |
|-----|--------|----------|---|---|---|---|---|---|---|---|---|
| 210 | WT     | exercise |   |   |   |   |   |   |   | * |   |
| 211 | WT     | exercise |   |   |   |   |   |   |   |   | * |
| 212 | WT     | exercise |   |   |   |   |   |   |   |   | * |
| 213 | WT     | exercise |   |   |   |   |   |   |   |   | * |
| 214 | WT     | exercise |   |   |   |   |   |   |   |   | * |
| 215 | WT     | exercise |   |   |   |   |   |   |   |   | * |
| 216 | WT     | exercise |   |   |   |   |   |   |   |   | * |
| 217 | WT     | exercise |   |   |   |   |   |   |   |   | * |
| 218 | WT     | exercise |   |   |   |   |   |   |   |   | * |
| 219 | WT     | exercise |   |   |   |   |   |   |   |   | * |
| 220 | WT     | exercise |   |   |   |   |   |   |   |   | * |
| 221 | WT     | exercise |   |   |   |   |   |   |   |   | * |
| 222 | WT     | exercise |   |   |   |   |   |   |   |   | * |
| 223 | Ts65Dn | exercise | * |   |   | * |   |   |   |   |   |
| 224 | Ts65Dn | exercise | * |   |   | * |   |   |   |   |   |
| 225 | Ts65Dn | exercise | * |   |   | * |   | * |   |   |   |
| 226 | Ts65Dn | exercise | * |   |   | * |   |   |   |   |   |
| 227 | Ts65Dn | exercise | * |   |   | * |   |   |   |   |   |
| 228 | Ts65Dn | exercise | * |   |   | * |   | * |   |   |   |
| 229 | Ts65Dn | exercise | * |   |   |   | * | * | * |   |   |
| 230 | Ts65Dn | exercise | * |   |   |   | * |   |   |   |   |
| 231 | Ts65Dn | exercise |   | * |   |   | * |   |   |   |   |
| 232 | Ts65Dn | exercise | * |   |   |   | * | * | * |   |   |
| 233 | Ts65Dn | exercise | * |   |   |   | * | * | * |   |   |
| 234 | Ts65Dn | exercise |   | * |   |   | * | * | * |   |   |
| 235 | Ts65Dn | exercise |   | * |   |   | * |   |   |   |   |
| 236 | Ts65Dn | exercise | * |   |   |   |   |   |   |   |   |
| 237 | Ts65Dn | exercise | * |   |   |   |   |   |   |   |   |
| 238 | Ts65Dn | exercise | * |   |   |   |   |   |   |   |   |
| 239 | Ts65Dn | exercise | * |   |   |   |   |   |   |   |   |
| 240 | Ts65Dn | exercise | * |   |   |   |   |   |   |   |   |
| 241 | Ts65Dn | exercise | * |   |   |   |   |   |   |   |   |
| 242 | Ts65Dn | exercise | * |   |   |   |   |   |   |   |   |
| 243 | Ts65Dn | exercise |   |   | * |   |   |   |   |   |   |
| 244 | Ts65Dn | exercise |   |   | * |   |   |   |   |   |   |
| 245 | Ts65Dn | exercise |   |   | * |   |   |   |   |   |   |
| 246 | Ts65Dn | exercise |   |   | * |   |   |   |   |   |   |
| 247 | Ts65Dn | exercise |   |   | * |   |   |   |   |   |   |
| 248 | Ts65Dn | exercise |   |   | * |   |   |   |   |   |   |
| 249 | Ts65Dn | exercise |   |   | * |   |   |   |   |   |   |
| 250 | Ts65Dn | exercise |   |   | * |   |   |   |   |   |   |
| 251 | Ts65Dn | exercise |   |   | * |   |   |   |   |   |   |
| 252 | Ts65Dn | exercise |   | * | * |   |   |   |   |   |   |
| 253 | Ts65Dn | exercise |   | * | * |   |   |   |   |   |   |
| 254 | Ts65Dn | exercise |   | * |   |   |   |   |   |   |   |
| 255 | Ts65Dn | exercise |   | * |   |   |   |   |   |   |   |
| 256 | Ts65Dn | exercise |   | * |   |   |   |   |   |   |   |

|     |        |          |   |   |   |  |  |  |  |   |   |
|-----|--------|----------|---|---|---|--|--|--|--|---|---|
| 257 | Ts65Dn | exercise |   | * |   |  |  |  |  |   |   |
| 258 | Ts65Dn | exercise |   | * |   |  |  |  |  |   |   |
| 259 | Ts65Dn | exercise |   | * |   |  |  |  |  |   |   |
| 260 | Ts65Dn | exercise |   | * |   |  |  |  |  |   |   |
| 261 | Ts65Dn | exercise |   | * |   |  |  |  |  |   |   |
| 262 | Ts65Dn | exercise |   |   |   |  |  |  |  | * |   |
| 263 | Ts65Dn | exercise |   |   |   |  |  |  |  | * |   |
| 264 | Ts65Dn | exercise |   |   |   |  |  |  |  | * |   |
| 265 | Ts65Dn | exercise |   |   |   |  |  |  |  | * |   |
| 266 | Ts65Dn | exercise |   |   |   |  |  |  |  | * |   |
| 267 | Ts65Dn | exercise |   |   |   |  |  |  |  | * |   |
| 268 | Ts65Dn | exercise |   |   |   |  |  |  |  | * |   |
| 269 | Ts65Dn | exercise |   |   |   |  |  |  |  | * |   |
| 270 | Ts65Dn | exercise |   |   |   |  |  |  |  | * |   |
| 271 | Ts65Dn | exercise |   |   |   |  |  |  |  | * |   |
| 272 | Ts65Dn | exercise |   |   |   |  |  |  |  | * |   |
| 273 | Ts65Dn | exercise |   |   |   |  |  |  |  | * |   |
| 274 | Ts65Dn | exercise |   |   |   |  |  |  |  |   | * |
| 275 | Ts65Dn | exercise |   |   |   |  |  |  |  |   | * |
| 276 | Ts65Dn | exercise |   |   |   |  |  |  |  |   | * |
| 277 | Ts65Dn | exercise |   |   |   |  |  |  |  |   | * |
| 278 | Ts65Dn | exercise |   |   |   |  |  |  |  |   | * |
| 279 | Ts65Dn | exercise |   |   |   |  |  |  |  |   | * |
| 280 | Ts65Dn | exercise |   |   |   |  |  |  |  |   | * |
| 281 | Ts65Dn | exercise |   |   |   |  |  |  |  |   | * |
| 282 | Ts65Dn | exercise |   |   |   |  |  |  |  |   | * |
| 283 | Ts65Dn | exercise |   |   |   |  |  |  |  |   | * |
| 284 | Ts65Dn | exercise |   |   |   |  |  |  |  |   | * |
| 285 | Ts65Dn | exercise |   |   |   |  |  |  |  |   | * |
| 286 | WT     | vehicle  | * |   |   |  |  |  |  |   |   |
| 287 | WT     | vehicle  | * |   |   |  |  |  |  |   |   |
| 288 | WT     | vehicle  | * |   |   |  |  |  |  |   |   |
| 289 | WT     | vehicle  | * |   |   |  |  |  |  |   |   |
| 290 | WT     | vehicle  | * |   |   |  |  |  |  |   |   |
| 291 | WT     | vehicle  | * |   |   |  |  |  |  |   |   |
| 292 | WT     | vehicle  | * |   | * |  |  |  |  |   |   |
| 293 | WT     | vehicle  | * |   | * |  |  |  |  |   |   |
| 294 | WT     | vehicle  | * |   | * |  |  |  |  |   |   |
| 295 | WT     | vehicle  | * |   | * |  |  |  |  |   |   |
| 296 | WT     | vehicle  | * |   | * |  |  |  |  |   |   |
| 297 | WT     | vehicle  | * |   | * |  |  |  |  |   |   |
| 298 | WT     | vehicle  | * |   | * |  |  |  |  |   |   |
| 299 | WT     | vehicle  | * |   | * |  |  |  |  |   |   |
| 300 | WT     | vehicle  | * |   |   |  |  |  |  |   |   |
| 301 | WT     | vehicle  | * |   |   |  |  |  |  |   |   |
| 302 | WT     | vehicle  | * |   |   |  |  |  |  |   |   |
| 303 | WT     | vehicle  |   | * |   |  |  |  |  |   |   |
| 304 | WT     | vehicle  |   | * |   |  |  |  |  |   |   |

|     |        |                 |   |   |   |  |  |  |  |   |   |
|-----|--------|-----------------|---|---|---|--|--|--|--|---|---|
| 305 | WT     | vehicle         |   | * |   |  |  |  |  |   |   |
| 306 | WT     | vehicle         |   | * |   |  |  |  |  |   |   |
| 307 | WT     | vehicle         |   | * |   |  |  |  |  |   |   |
| 308 | WT     | vehicle         |   | * |   |  |  |  |  |   |   |
| 309 | WT     | vehicle         |   | * |   |  |  |  |  |   |   |
| 310 | WT     | vehicle         |   | * |   |  |  |  |  |   |   |
| 311 | WT     | vehicle         |   | * |   |  |  |  |  |   |   |
| 312 | WT     | vehicle         |   | * |   |  |  |  |  |   |   |
| 313 | WT     | vehicle         |   | * |   |  |  |  |  |   |   |
| 314 | WT     | vehicle         |   | * |   |  |  |  |  |   |   |
| 315 | WT     | vehicle         |   | * |   |  |  |  |  |   |   |
| 316 | WT     | vehicle         |   | * |   |  |  |  |  |   |   |
| 317 | WT     | vehicle         |   | * |   |  |  |  |  |   |   |
| 318 | WT     | vehicle         |   | * |   |  |  |  |  |   |   |
| 319 | WT     | vehicle         |   |   |   |  |  |  |  | * |   |
| 320 | WT     | vehicle         |   |   |   |  |  |  |  | * |   |
| 321 | WT     | vehicle         |   |   |   |  |  |  |  | * |   |
| 322 | WT     | vehicle         |   |   |   |  |  |  |  | * |   |
| 323 | WT     | vehicle         |   |   |   |  |  |  |  | * |   |
| 324 | WT     | vehicle         |   |   |   |  |  |  |  | * |   |
| 325 | WT     | vehicle         |   |   |   |  |  |  |  |   | * |
| 326 | WT     | vehicle         |   |   |   |  |  |  |  |   | * |
| 327 | WT     | vehicle         |   |   |   |  |  |  |  |   | * |
| 328 | WT     | vehicle         |   |   |   |  |  |  |  |   | * |
| 329 | WT     | vehicle         |   |   |   |  |  |  |  |   | * |
| 330 | WT     | vehicle         |   |   |   |  |  |  |  |   | * |
| 331 | WT     | vehicle         |   |   |   |  |  |  |  |   | * |
| 332 | WT     | vehicle         |   |   |   |  |  |  |  |   | * |
| 333 | WT     | vehicle         |   |   |   |  |  |  |  |   | * |
| 334 | WT     | vehicle         |   |   |   |  |  |  |  |   | * |
| 335 | WT     | vehicle         |   |   |   |  |  |  |  |   | * |
| 336 | WT     | vehicle         |   |   |   |  |  |  |  |   | * |
| 337 | WT     | vehicle (acute) |   |   |   |  |  |  |  |   | * |
| 338 | WT     | vehicle (acute) |   |   |   |  |  |  |  |   | * |
| 339 | WT     | vehicle (acute) |   |   |   |  |  |  |  |   | * |
| 340 | WT     | vehicle (acute) |   |   |   |  |  |  |  |   | * |
| 341 | WT     | vehicle (acute) |   |   |   |  |  |  |  |   | * |
| 342 | WT     | vehicle (acute) |   |   |   |  |  |  |  |   | * |
| 343 | WT     | vehicle (acute) |   |   |   |  |  |  |  |   | * |
| 344 | WT     | vehicle (acute) |   |   |   |  |  |  |  |   | * |
| 345 | WT     | vehicle (acute) |   |   |   |  |  |  |  |   | * |
| 346 | WT     | vehicle (acute) |   |   |   |  |  |  |  |   | * |
| 347 | WT     | vehicle (acute) |   |   |   |  |  |  |  |   | * |
| 348 | WT     | vehicle (acute) |   |   |   |  |  |  |  |   | * |
| 349 | WT     | vehicle (acute) |   |   |   |  |  |  |  |   | * |
| 350 | WT     | vehicle (acute) |   |   |   |  |  |  |  |   | * |
| 351 | WT     | vehicle (acute) |   |   |   |  |  |  |  |   | * |
| 352 | WT     | vehicle (acute) |   |   |   |  |  |  |  |   | * |
| 353 | Ts65Dn | vehicle         | * |   | * |  |  |  |  |   |   |





|     |        |             |   |   |   |  |  |  |  |   |
|-----|--------|-------------|---|---|---|--|--|--|--|---|
| 452 | WT     | DHF         |   |   |   |  |  |  |  | * |
| 453 | WT     | DHF         |   |   |   |  |  |  |  | * |
| 454 | WT     | DHF         |   |   |   |  |  |  |  | * |
| 455 | WT     | DHF         |   |   |   |  |  |  |  | * |
| 456 | WT     | DHF (acute) |   |   |   |  |  |  |  | * |
| 457 | WT     | DHF (acute) |   |   |   |  |  |  |  | * |
| 458 | WT     | DHF (acute) |   |   |   |  |  |  |  | * |
| 459 | WT     | DHF (acute) |   |   |   |  |  |  |  | * |
| 460 | WT     | DHF (acute) |   |   |   |  |  |  |  | * |
| 461 | WT     | DHF (acute) |   |   |   |  |  |  |  | * |
| 462 | WT     | DHF (acute) |   |   |   |  |  |  |  | * |
| 463 | WT     | DHF (acute) |   |   |   |  |  |  |  | * |
| 464 | WT     | DHF (acute) |   |   |   |  |  |  |  | * |
| 465 | WT     | DHF (acute) |   |   |   |  |  |  |  | * |
| 466 | WT     | DHF (acute) |   |   |   |  |  |  |  | * |
| 467 | WT     | DHF (acute) |   |   |   |  |  |  |  | * |
| 468 | WT     | DHF (acute) |   |   |   |  |  |  |  | * |
| 469 | WT     | DHF (acute) |   |   |   |  |  |  |  | * |
| 470 | WT     | DHF (acute) |   |   |   |  |  |  |  | * |
| 471 | WT     | DHF (acute) |   |   |   |  |  |  |  | * |
| 472 | WT     | DHF (acute) |   |   |   |  |  |  |  | * |
| 473 | WT     | DHF (acute) |   |   |   |  |  |  |  | * |
| 474 | WT     | DHF (acute) |   |   |   |  |  |  |  | * |
| 475 | WT     | DHF (acute) |   |   |   |  |  |  |  | * |
| 476 | Ts65Dn | DHF         | * |   |   |  |  |  |  |   |
| 477 | Ts65Dn | DHF         | * |   |   |  |  |  |  |   |
| 478 | Ts65Dn | DHF         | * |   |   |  |  |  |  |   |
| 479 | Ts65Dn | DHF         | * |   |   |  |  |  |  |   |
| 480 | Ts65Dn | DHF         | * |   |   |  |  |  |  |   |
| 481 | Ts65Dn | DHF         | * |   |   |  |  |  |  |   |
| 482 | Ts65Dn | DHF         | * |   |   |  |  |  |  |   |
| 483 | Ts65Dn | DHF         | * |   |   |  |  |  |  |   |
| 484 | Ts65Dn | DHF         | * |   | * |  |  |  |  |   |
| 485 | Ts65Dn | DHF         | * |   | * |  |  |  |  |   |
| 486 | Ts65Dn | DHF         | * |   | * |  |  |  |  |   |
| 487 | Ts65Dn | DHF         | * |   | * |  |  |  |  |   |
| 488 | Ts65Dn | DHF         | * |   | * |  |  |  |  |   |
| 489 | Ts65Dn | DHF         | * |   | * |  |  |  |  |   |
| 490 | Ts65Dn | DHF         | * |   | * |  |  |  |  |   |
| 491 | Ts65Dn | DHF         | * |   |   |  |  |  |  |   |
| 492 | Ts65Dn | DHF         | * |   |   |  |  |  |  |   |
| 493 | Ts65Dn | DHF         | * |   |   |  |  |  |  |   |
| 494 | Ts65Dn | DHF         |   | * |   |  |  |  |  |   |
| 495 | Ts65Dn | DHF         |   | * |   |  |  |  |  |   |
| 496 | Ts65Dn | DHF         |   | * |   |  |  |  |  |   |
| 497 | Ts65Dn | DHF         |   | * |   |  |  |  |  |   |
| 498 | Ts65Dn | DHF         |   | * |   |  |  |  |  |   |
| 499 | Ts65Dn | DHF         |   | * |   |  |  |  |  |   |
| 500 | Ts65Dn | DHF         |   | * |   |  |  |  |  |   |



|     |        |             |  |   |  |  |  |  |   |   |
|-----|--------|-------------|--|---|--|--|--|--|---|---|
| 501 | Ts65Dn | DHF         |  | * |  |  |  |  |   |   |
| 502 | Ts65Dn | DHF         |  | * |  |  |  |  |   |   |
| 503 | Ts65Dn | DHF         |  | * |  |  |  |  |   |   |
| 504 | Ts65Dn | DHF         |  | * |  |  |  |  |   |   |
| 505 | Ts65Dn | DHF         |  |   |  |  |  |  | * |   |
| 506 | Ts65Dn | DHF         |  |   |  |  |  |  | * |   |
| 507 | Ts65Dn | DHF         |  |   |  |  |  |  | * |   |
| 508 | Ts65Dn | DHF         |  |   |  |  |  |  |   | * |
| 509 | Ts65Dn | DHF         |  |   |  |  |  |  |   | * |
| 510 | Ts65Dn | DHF         |  |   |  |  |  |  |   | * |
| 511 | Ts65Dn | DHF         |  |   |  |  |  |  |   | * |
| 512 | Ts65Dn | DHF         |  |   |  |  |  |  |   | * |
| 513 | Ts65Dn | DHF         |  |   |  |  |  |  |   | * |
| 514 | Ts65Dn | DHF         |  |   |  |  |  |  |   | * |
| 515 | Ts65Dn | DHF         |  |   |  |  |  |  |   | * |
| 516 | Ts65Dn | DHF         |  |   |  |  |  |  |   | * |
| 517 | Ts65Dn | DHF         |  |   |  |  |  |  |   | * |
| 518 | Ts65Dn | DHF         |  |   |  |  |  |  |   | * |
| 519 | Ts65Dn | DHF         |  |   |  |  |  |  |   | * |
| 520 | Ts65Dn | DHF (acute) |  |   |  |  |  |  |   | * |
| 521 | Ts65Dn | DHF (acute) |  |   |  |  |  |  |   | * |
| 522 | Ts65Dn | DHF (acute) |  |   |  |  |  |  |   | * |
| 523 | Ts65Dn | DHF (acute) |  |   |  |  |  |  |   | * |
| 524 | Ts65Dn | DHF (acute) |  |   |  |  |  |  |   | * |
| 525 | Ts65Dn | DHF (acute) |  |   |  |  |  |  |   | * |
| 526 | Ts65Dn | DHF (acute) |  |   |  |  |  |  |   | * |
| 527 | Ts65Dn | DHF (acute) |  |   |  |  |  |  |   | * |
| 528 | Ts65Dn | DHF (acute) |  |   |  |  |  |  |   | * |
| 529 | Ts65Dn | DHF (acute) |  |   |  |  |  |  |   | * |
| 530 | Ts65Dn | DHF (acute) |  |   |  |  |  |  |   | * |
| 531 | Ts65Dn | DHF (acute) |  |   |  |  |  |  |   | * |
| 532 | Ts65Dn | DHF (acute) |  |   |  |  |  |  |   | * |
| 533 | Ts65Dn | DHF (acute) |  |   |  |  |  |  |   | * |
| 534 | Ts65Dn | DHF (acute) |  |   |  |  |  |  |   | * |
| 535 | Ts65Dn | DHF (acute) |  |   |  |  |  |  |   | * |
| 536 | Ts65Dn | DHF (acute) |  |   |  |  |  |  |   | * |
| 537 | Ts65Dn | DHF (acute) |  |   |  |  |  |  |   | * |
| 538 | Ts65Dn | DHF (acute) |  |   |  |  |  |  |   | * |
| 539 | Ts65Dn | DHF (acute) |  |   |  |  |  |  |   | * |

Asterisk indicates the experimental procedure/test carried out on each mouse.

NOR: Novel Object Recognition test. OL: Object Location test. CFC: Contextual Fear Conditioning test. IHC: Immunohistochemistry. EM: Electron Microscopy. EPhy: Electrophysiology. Bioch: Biochemistry.

Mice highlighted in yellow did perform the NOR or OL behavioral tests, but could not be included in the study because we lost the video-recording files of the behavioral tests due to the failure of a hard-drive in which they were stored. Files could not be recovered.

## Supplementary references

Costa, A. C. S., M. R. Stasko, C. Schmidt and M. T. Davison (2010). "Behavioral validation of the Ts65Dn mouse model for Down syndrome of a genetic background free of the retinal degeneration mutation Pde6brd1." Behavioural Brain Research **206**: 52-62.
